# Supplementary material for: Effects of sonication parameters on transcranial focused ultrasound brain stimulation in an ovine model
Source: PubMed Central journal article supplement (PMC6812789; doi:10.1371/journal.pone.0224311), 2019-10-24
Supplement: pone.0224311.s001.pdf [file pone.0224311.s001.pdf]

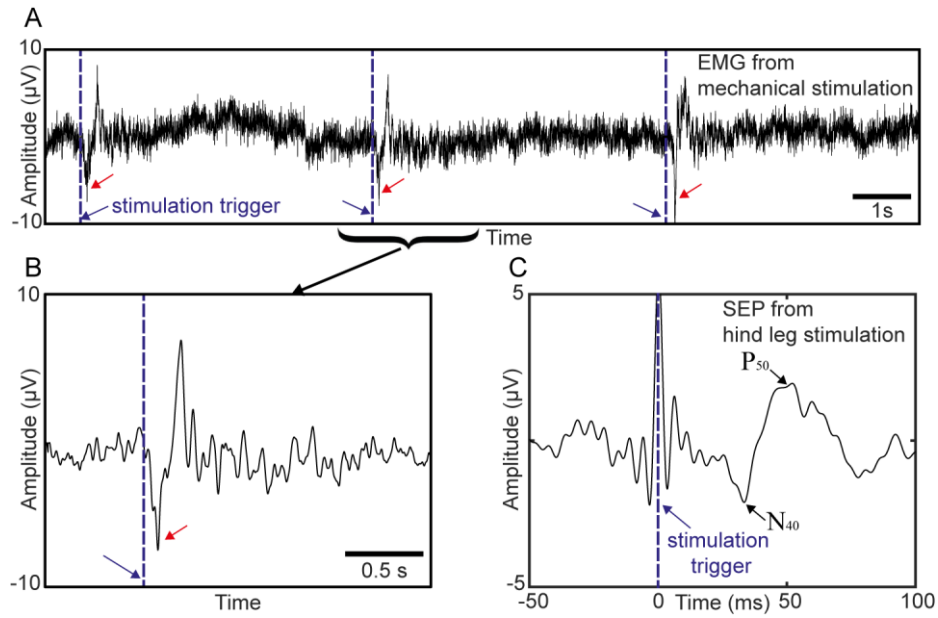

**S1 Fig. Example of the recorded EMG and EEG profiles without FUS sonication.** (A) EMG signal (low-pass filtered using threshold of 200 Hz) obtained from the gastrocnemius of the right hind limb showed three signal bursts (marked by red arrows; indicating the first negative peak) elicited by superficial mechanical stimulation of the corresponding leg nerve. The blue dashed line indicates the timing of stimulation onset. (B) EMG signal (low-pass filter of 30 Hz high cut-off) from the time segment marked by the bracket in (A). (C) EEG SEP signal (bandpass filtered at 0.5–200 Hz) induced by electrical stimulation of the contralateral hind leg. A negative peak ( $N_{40}$ ) and positive peak ( $P_{50}$ ) were detected at ~40 ms and ~50 ms, respectively.
