# Supplementary material for: Effects of sonication parameters on transcranial focused ultrasound brain stimulation in an ovine model
Source: PubMed Central journal article supplement (PMC6812789; doi:10.1371/journal.pone.0224311), 2019-10-24
Supplement: pone.0224311.s002.pdf [file pone.0224311.s002.pdf]

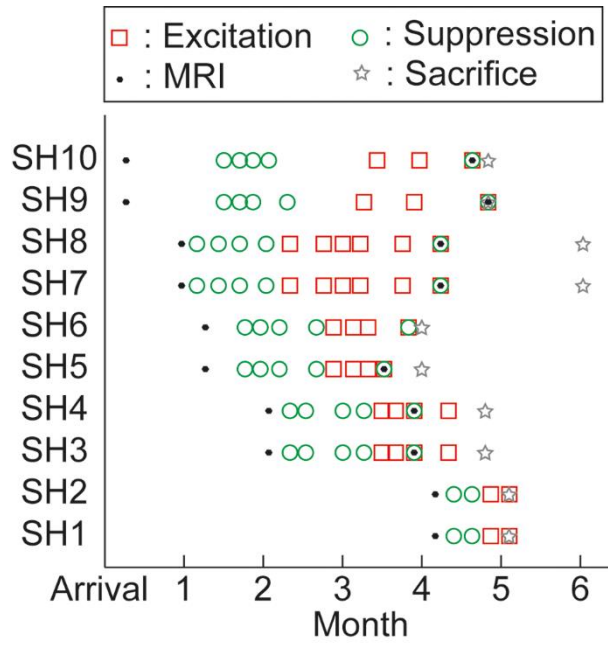

**S2 Fig. Experimental timeline from arrival to sacrifice across ten animals ('SH1'-'SH10').**
